# Supplementary material for: Extensive Computational Screening Identifies Marco (SR-A6) and Abca1/2 as Key Regulators of Intracellular Lipid Metabolism to Compensate Low Cholesterol Biosynthesis in M1 Macrophages Hysteresis
Source: Preprints.org preprint supplement (doi:10.20944/preprints202411.0082.v1), 2024-11-01
Supplement: Supplementary file 1 [file supplementary]

Supplementary Material

# Supplementary Figures

**Figure S1** PCA of RNA-seq data prior to batch effect correction. The dot colors represent different macrophage phenotypes and lipid-loaded macrophages, as illustrated in the figure.


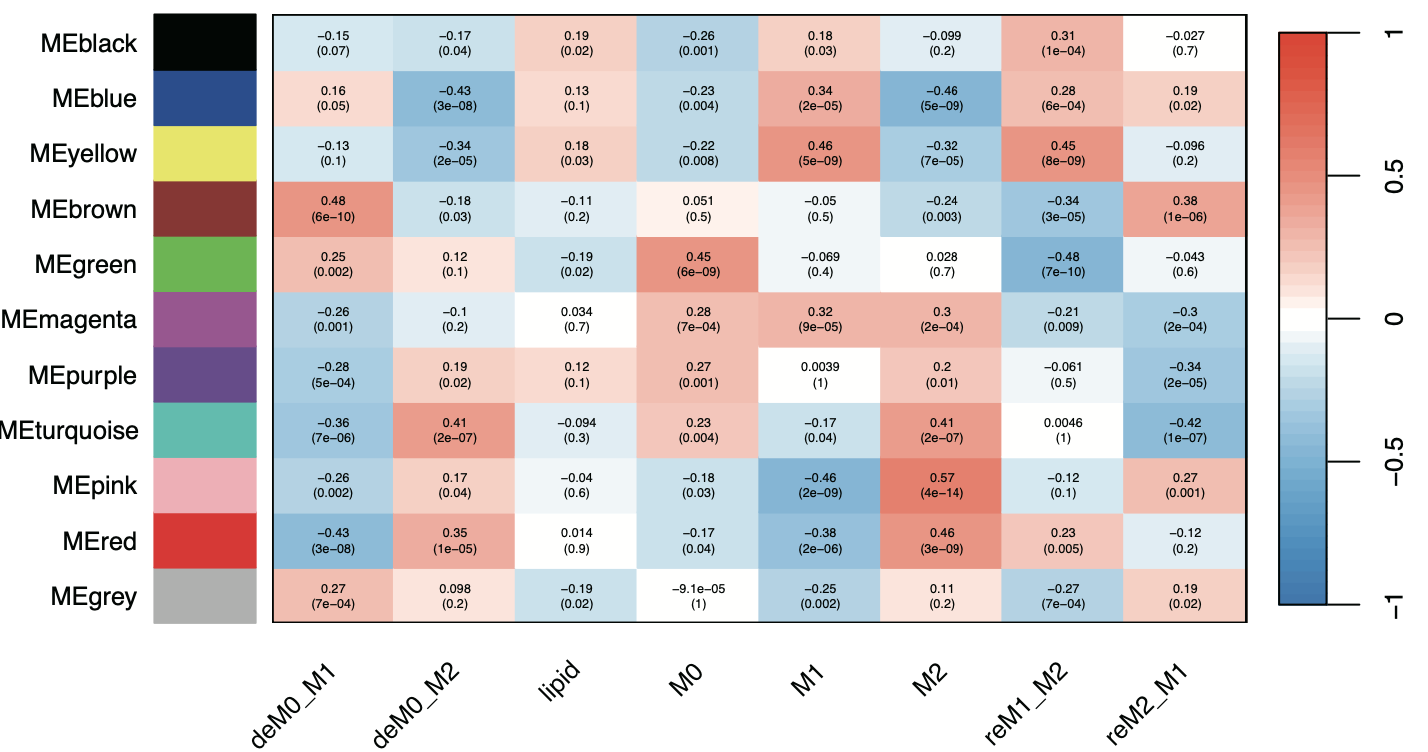


**Figure S2** Preliminary WGCNA results using lipid-loaded and polarized samples. Heatmap showing the associations between module eigengenes, and all identified co-expression modules.


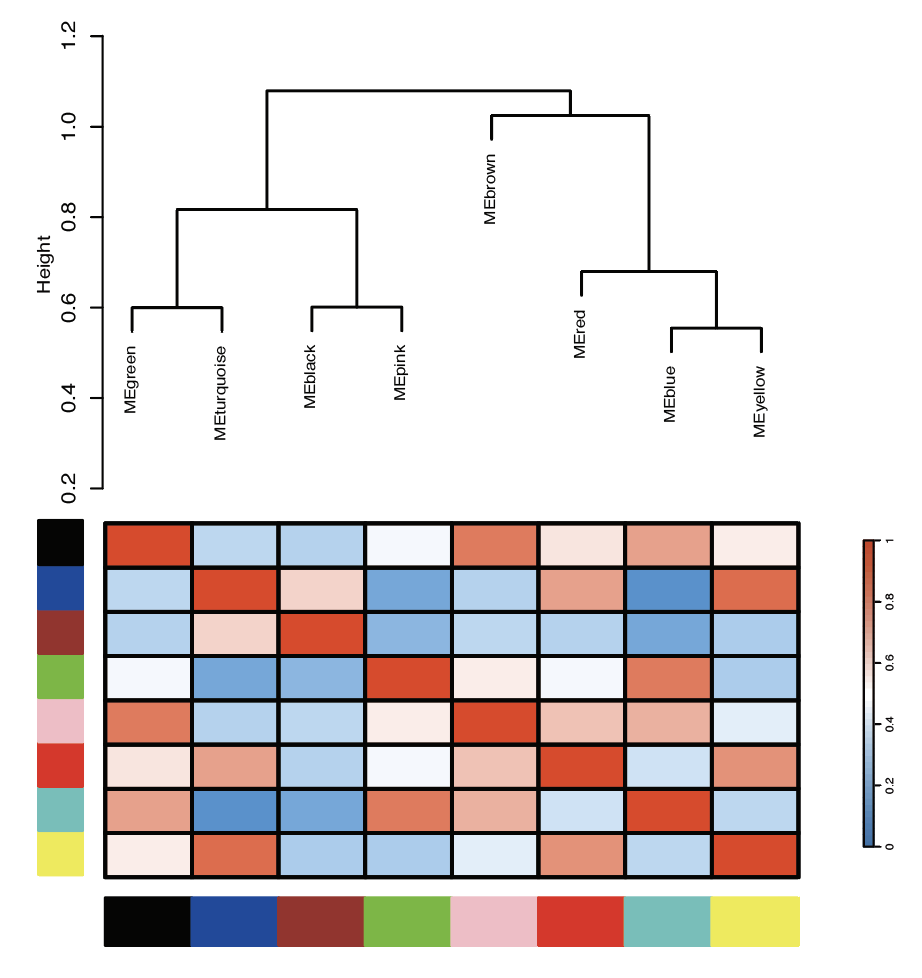


**Figure S3** The eigengene network's heatmap shows correlations between various modules; those with strong connections are grouped together.

**Figure S4** The gene expression levels of hysteresis genes in the MEblue across macrophage polarization data.

**Figure S5** The gene expression levels of hysteresis genes in the MEbrown across macrophage polarization data.


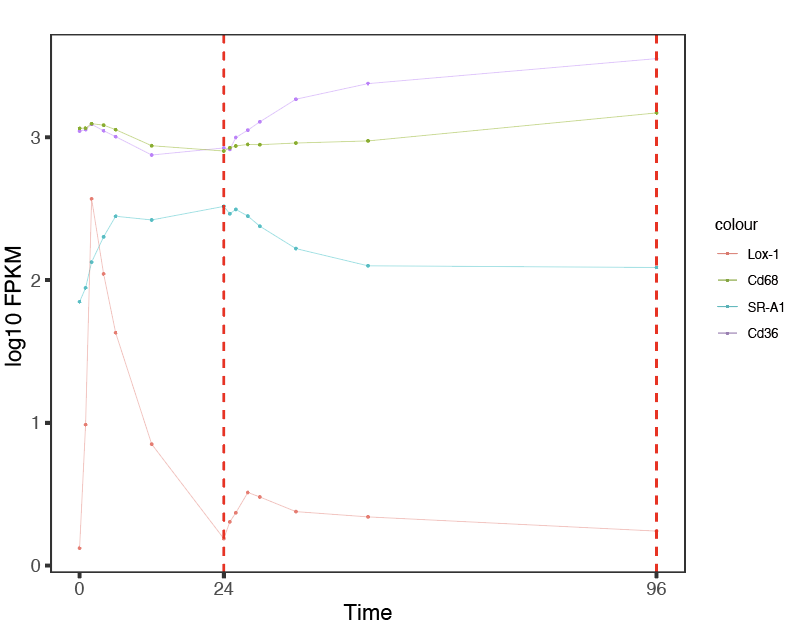


**Figure S6** Gene expression levels of Lox-1, Cd68, SR-A1, Cd36 under M0->M1->M2 between 0 to 96 hours.


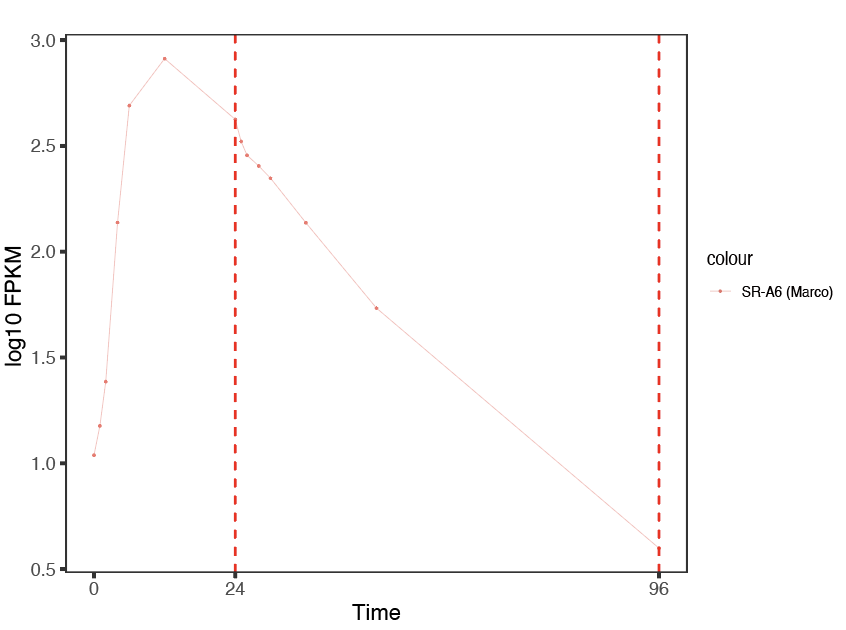


**Figure S7** Gene expression levels of Marco under M0->M1->M2 between 0 to 96 hours.


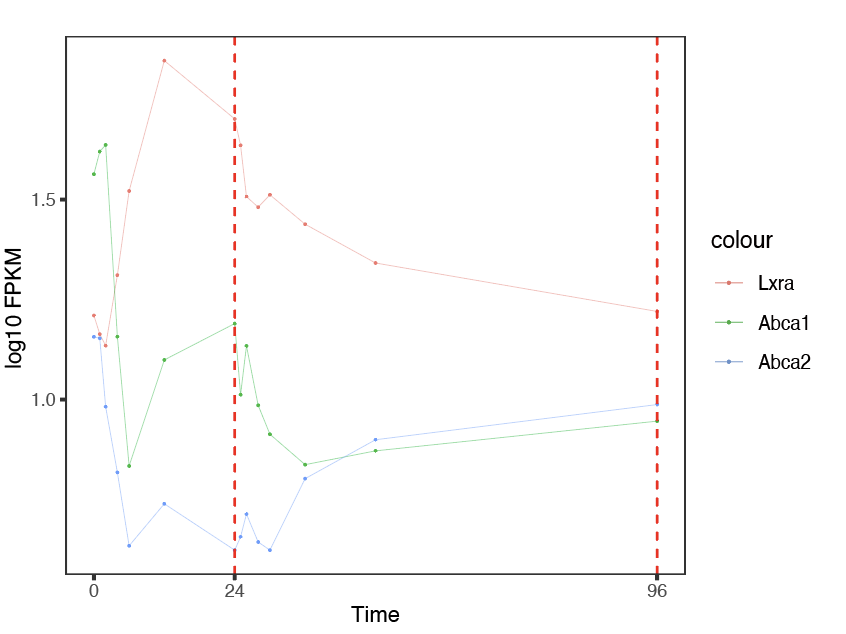


**Figure S8** Gene expression levels of Lxra, Abca1, Abca2 under M0->M1->M2 between 0 to 96 hours.


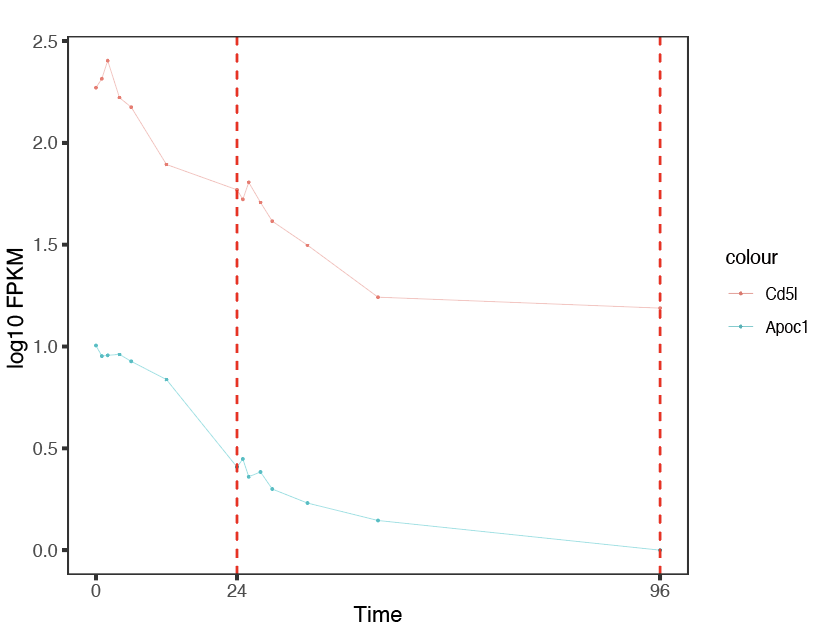


**Figure S9** Gene expression levels of Cd5l, Apoc1under M0->M1->M2 between 0 to 96 hours.
